# Supplementary material for: Tubular cell senescence promotes maladaptive kidney repair and chronic kidney disease after cisplatin nephrotoxicity
Source: PubMed Central journal article supplement (PMC10243740; doi:10.1172/jci.insight.166643), 2023-04-24
Supplement: jciinsight-8-166643-s166.pdf [file jciinsight-8-166643-s166.pdf]

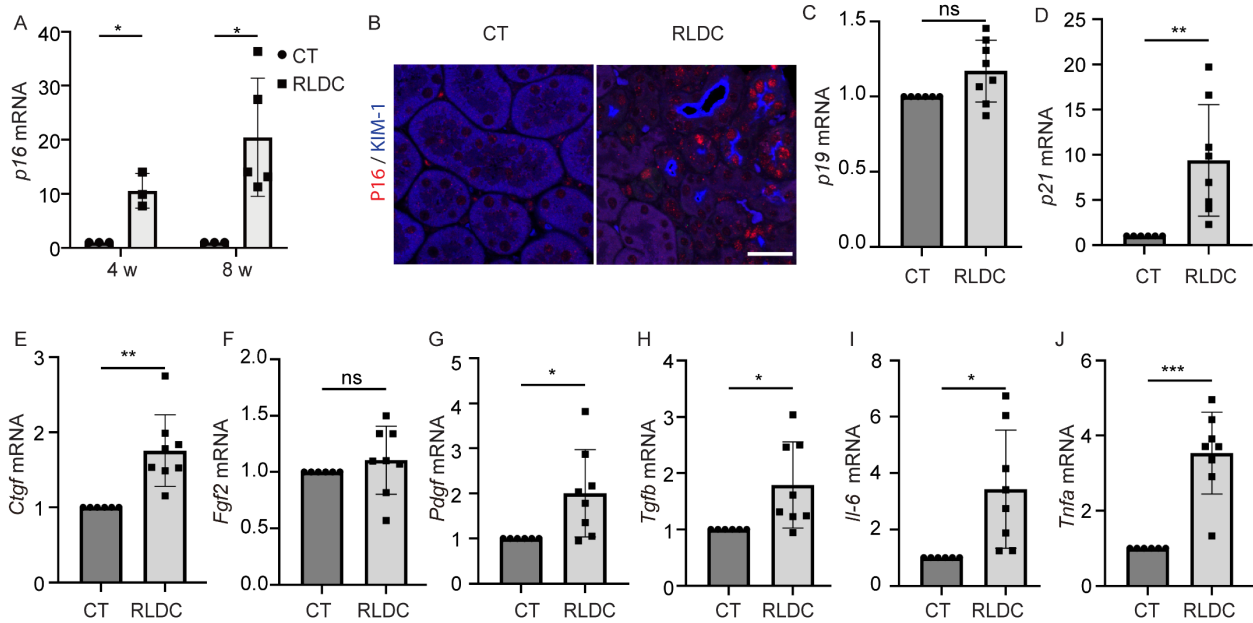

### Supplemental Figure 1. Multiple senescence-regulating genes and SASP factors are induced in post-RLDC kidneys.

C57BL/6 mice were subjected to RLDC or saline control (CT) treatment. **(A)** Kidneys were collected at both 4 weeks and 8 weeks for RT-PCR analysis of p16 mRNA expression (4 w: CT: n=3, RLDC: n=3; 8 w: CT: n=3, RLDC: n=5). **(B)** Representative images of co-staining of P16 (red) and KIM-1 (blue). Scale bar: 50  $\mu$ m. **(C-J)** RT-PCR analysis of *p19*, *p21*, *Ctgf*, *Fgf2*, *Pdgfb*, *Tgfb*, *Il-6* and *Tnfa* mRNA expression at 8 weeks (CT: n=6, RLDC: n=8). Quantitative data are presented as mean  $\pm$  SD. For statistics, two-way ANOVA with multiple comparisons was used for **(A)**; 2-tailed, unpaired t test was used for **(C-J)**. \*P < 0.05, \*\*P < 0.01, \*\*\*P < 0.005, and \*\*\*\*P < 0.001.

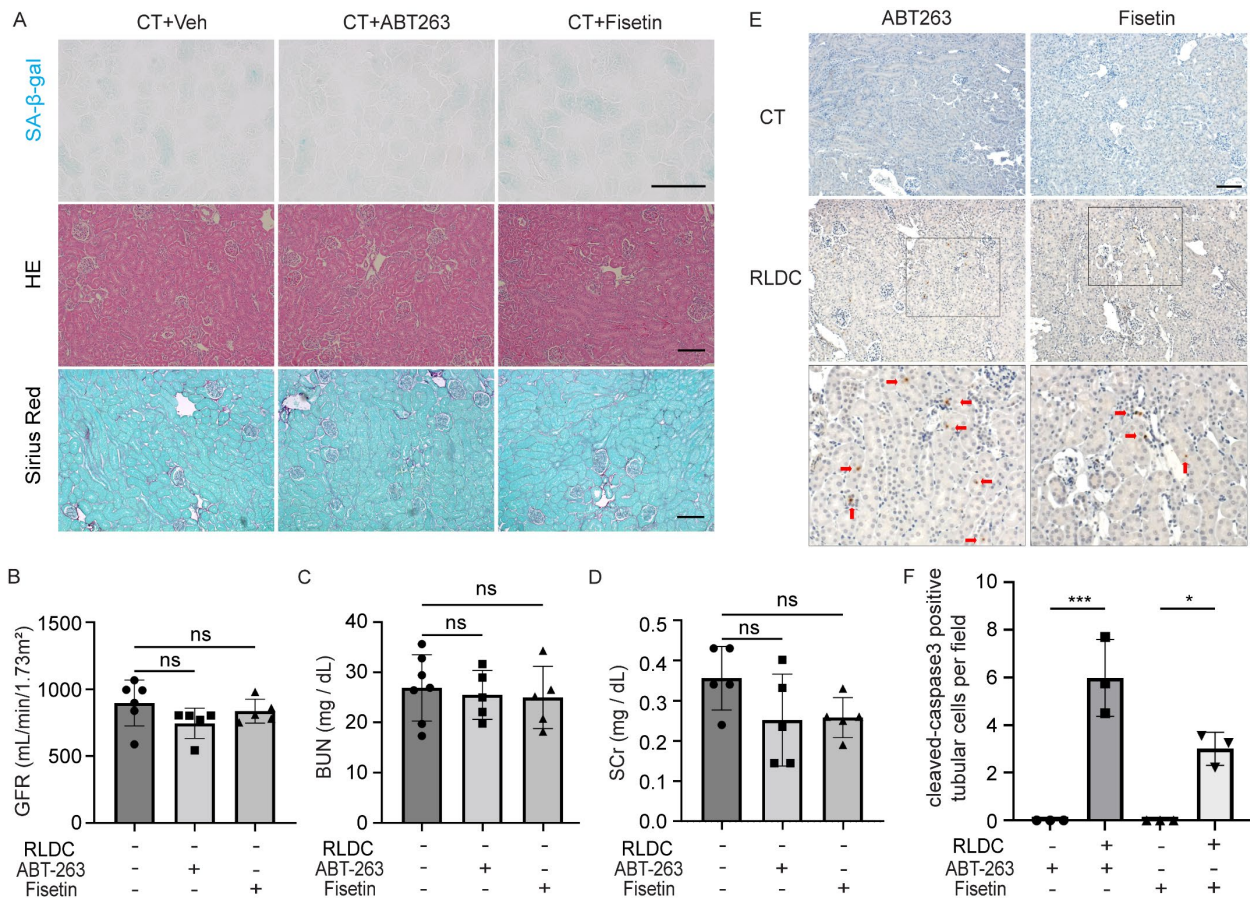

**Supplemental Figure 2. Both ABT-263 and Fisetin induces senescent tubular cell apoptosis in post-RLDC mice whereas not toxic to control mice.**

(A-D) Saline control (CT) mice were subjected to 4-week treatment of vehicle (n=5 to 7), ABT-263 (n=5) or Fisetin (n=5). Blood samples and kidneys were harvested for renal function and histology analysis. Glomerular filtration rate (GFR) was measured one day before tissue harvesting. (A) Representative images of SA-β-gal staining (top panels), hematoxylin-eosin (HE) staining (middle panels) and Sirius red/Fat Green staining (bottom panels). Scale bar: 50 μm. (B-D) Quantification of GFR, blood urea nitrogen (BUN) and serum creatinine (SCr). (E) Both saline control (CT) and post-RLDC mice were subjected to 4-week treatment of ABT-263 or Fisetin. Kidneys were collected for immunohistochemical staining of cleaved caspase 3. The bottom images are enlarged from the boxed areas in RLDC groups. Arrows indicate cleaved caspase 3 positive tubular cells. Scale bar: 50 μm. (F) Quantification of cleaved caspase 3 positive tubular cells per 400× field (n=3 in each group). Quantitative data are presented as mean ± SD. One-way ANOVA with multiple comparisons was used for statistics. \*P < 0.05, \*\*P < 0.01, \*\*\*P < 0.005, and \*\*\*\*P < 0.001.

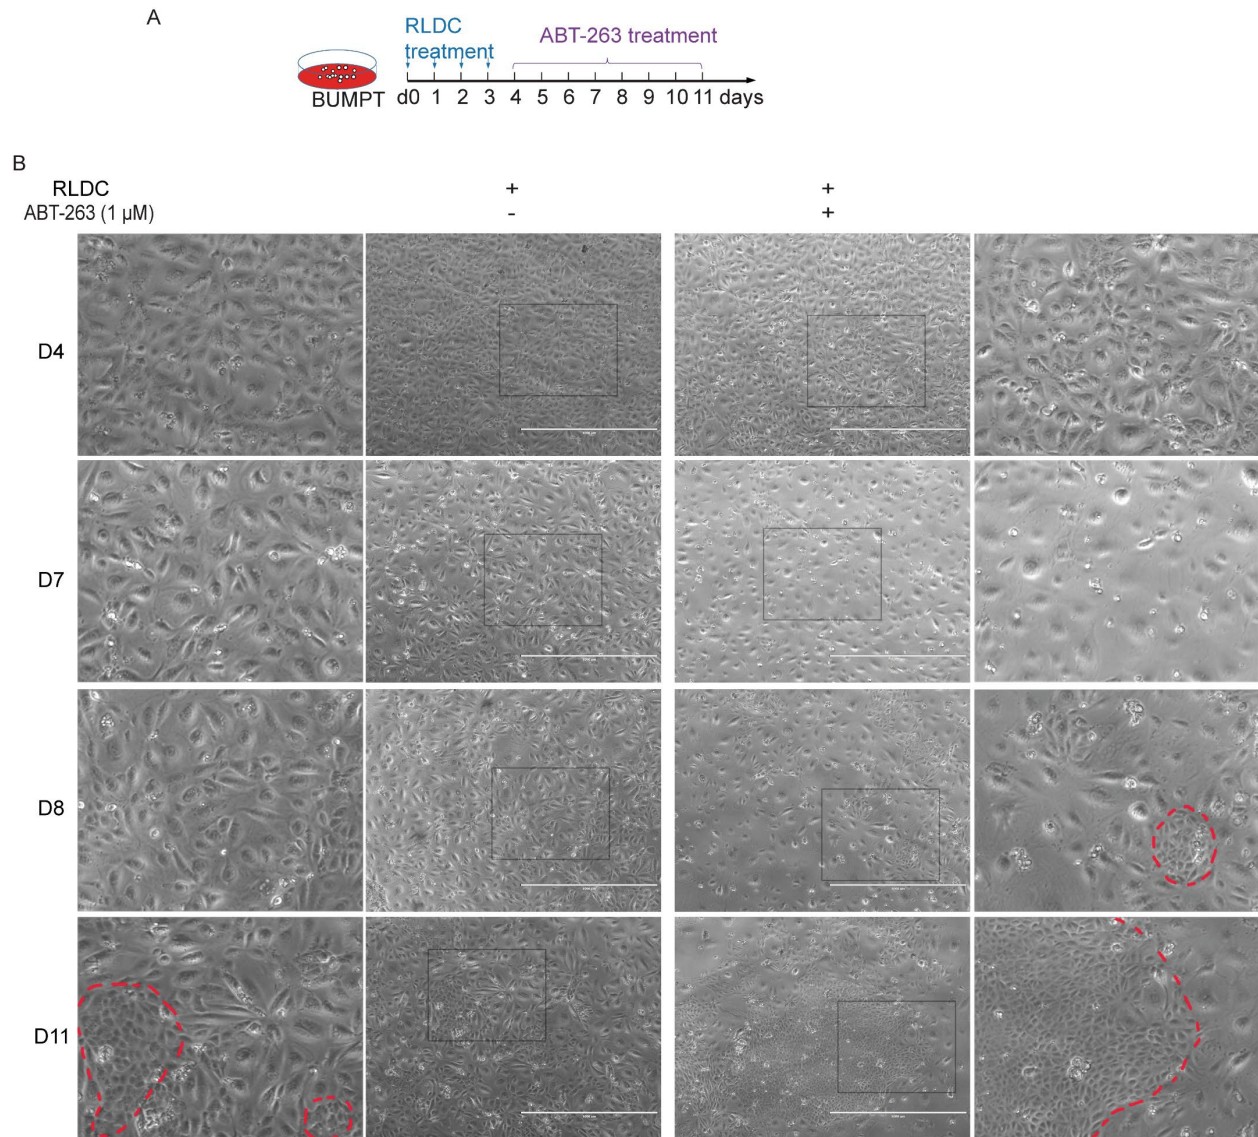

**Supplemental Figure 3 ABT-263 promotes the proliferation of surviving BUMPT cells after RLDC treatment.**

(A) The schematic diagram of treatment. BUMPT cells were subjected to RLDC treatment for 96 h, followed by 7-day treatment of ABT-263 or vehicle (n= 8 experiments). (B) Representative images of the proliferation of post-RLDC surviving BUMPT cells at multiple time points during ABT-263 treatment. The boxed areas in the middle panels are enlarged for a close look at the formation of cell colonies outlined by dotted red curves. Scale bar: 1000  $\mu$ m.

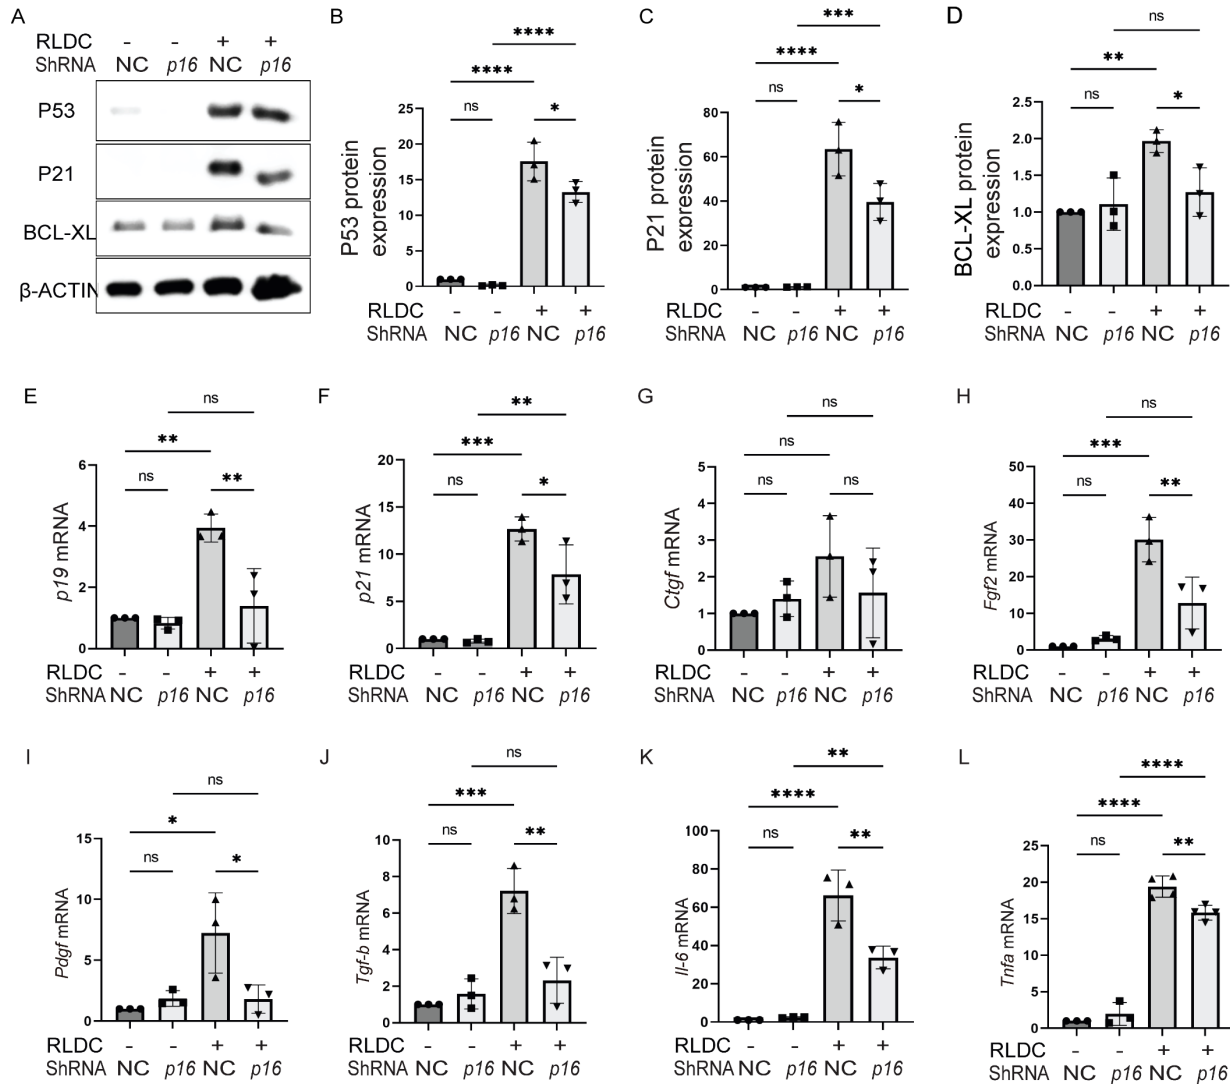

**Supplemental Figure 4. Knockdown of *p16* suppresses the induction of multiple senescence-regulating genes and SASP factors in RLDC-treated BUMPT cells.** BUMPT cells were transfected with *p16*-shRNA or negative control (NC) shRNA and then selected with puromycin for 2 weeks to establish stable cells for the subsequent RLDC treatment. **(A)** Immunoblot analysis for P53, P21 and BCL-XL. **(B-D)** Densitometry of P53, P21 and BCL-XL expression (n=3 experiments). **(E-L)** RT-PCR analysis of *p19*, *p21*, *Ctgf*, *Fgf2*, *Pdgfb*, *Tgfb*, *Il-6* and *Tnfa* mRNA expression (n=3 experiments). Quantitative data are presented as mean  $\pm$  SD. Two-way ANOVA with multiple comparisons was used for statistics. \*P < 0.05, \*\*P < 0.01, \*\*\*P < 0.005, and \*\*\*\*P < 0.001.

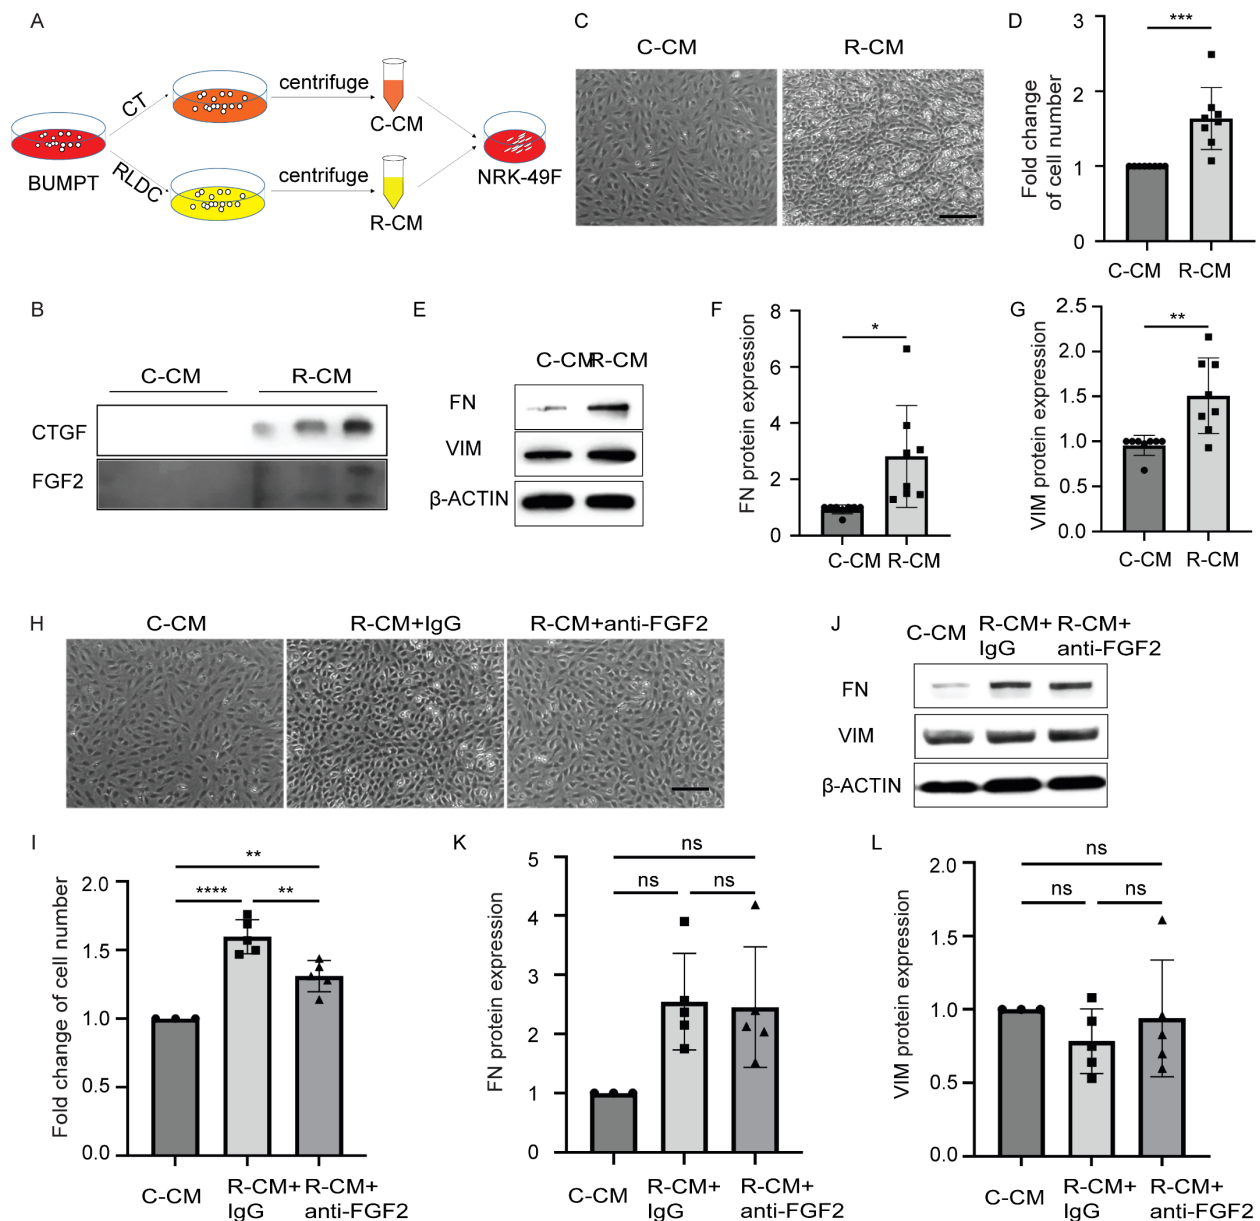

### Supplemental Figure 5. RLDC-induced senescent tubular cells activates renal fibroblasts in a paracrine manner.

(A) Schematic diagram of treatment. Conditioned medium was collected from either control BUMPT cells (C-CM) or post-RLDC BUMPT cells (R-CM). NRK-49F fibroblasts were incubated with serum-free medium containing C-CM or R-CM for 48 h (n=8 experiments). (B) Immunoblot analysis for secreted CTGF and FGF2 in CMs. (C) Cell morphology of NRK-49F fibroblasts. Scale bar: 400  $\mu$ m. (D) Quantification of the fold changes of NRK-49F fibroblast cell numbers. (E) Immunoblot analysis for FN and VIM in NRK-49F fibroblasts. (F and G) Densitometry of FN and VIM expression. (H-L) Conditioned medium was collected from either control BUMPT cells (C-CM) or post-RLDC BUMPT cells (R-CM). NRK-49F fibroblasts were incubated with serum-free medium containing C-CM, R-CM with IgG (R-CM + IgG), or R-CM with FGF2 neutralizing antibody (R-CM + anti-FGF2) for 48 h (n=4 experiments). (H) Cell morphology of NRK-

49F fibroblasts. Scale bar: 400  $\mu$ m. **(I)** Quantification of the fold changes of NRK-49F fibroblast cell number. **(J)** Immunoblot analysis for FN and VIM in NRK-49F fibroblasts. **(K and L)** Densitometry of FN and VIM expression. Quantitative data are presented as mean  $\pm$  SD. For statistics, 2-tailed, unpaired t test was used for **(D, F and G)**; one-way ANOVA with multiple comparisons was used for **(I, K and L)**. \*P < 0.05, \*\*P < 0.01, \*\*\*P < 0.005, and \*\*\*\*P < 0.001.

| Gene                                       | Forward primer                          | Reverse primer                           |
|--------------------------------------------|-----------------------------------------|------------------------------------------|
| <i>Mouse p16 mRNA</i>                      | 5'-CTC TGC TCT TGG GAT<br>TGG C-3'      | 5'-GTG CGA TAT TTG CGT G-3'              |
| <i>Mouse p19 mRNA</i>                      | 5'-CAG TAG TAC CGG AGG<br>CAT CT -3'    | 5'-TGA ACC GCT TTG GCA<br>AGA-3'         |
| <i>Mouse p21 mRNA</i>                      | 5'-CTT GTC GTC TTG CAC T-<br>3'         | 5'-AAT CTG CGC TTG GAG<br>TAG-3'         |
| <i>Mouse Ctgf mRNA</i>                     | 5'-TTG ACA GGC TTG GCG<br>ATT-3'        | 5'-GTT ACC AAT GAC AAT ACC<br>TTC TGC-3' |
| <i>Mouse Fgf2 mRNA</i>                     | 5'-GTC AAA CTA CAA CTC<br>CAA GCA G -3' | 5'-GAA ACA CTC TTC TGT AAC<br>ACA CTT-3' |
| <i>Mouse Pdgfb mRNA</i>                    | 5'- TTC CTC TCT GCT GCT<br>ACC T-3'     | 5'-CAG CCC CAT CTT CAT CTA<br>CG-3'      |
| <i>Mouse Tgfb mRNA</i>                     | 5'-GCG GAC TAC TAT GCT<br>AAA GAG G-3'  | 5'- CCG AAT GTC TGA CGT ATT<br>GAA GA-3' |
| <i>Mouse Il-6 mRNA</i>                     | 5'-TCC TTA GCC ACT CCT<br>TCT GT-3'     | 5'-AGC CAG AGT CCT TCA<br>GAG -3'        |
| <i>Mouse <math>\beta</math>-actin mRNA</i> | 5'-GAT TAC TGC TCT GGC<br>TCC TAG-3',   | 5'-GAC TCA TCG TAC TCC TGC<br>TTG -3'    |

Supplemental Table 1. Summary of mRNA primers.
